# Supplementary material for: Genetic diversity of soil invertebrates corroborates timing estimates for past collapses of the West Antarctic Ice Sheet
Source: PubMed Central journal article supplement — Proc Natl Acad Sci U S A. 2020 Aug 24;117(36):22293–302. doi: 10.1073/pnas.2007925117 (PMC7486705; doi:10.1073/pnas.2007925117), 2020-08-24
Supplement: pnas.2007925117.sapp.pdf [file pnas.2007925117.sapp.pdf]

# PNAS

[www.pnas.org](http://www.pnas.org)

Supplementary Information for

Genetic diversity of soil invertebrates corroborates timing estimates for past collapses of the West Antarctic Ice Sheet

Gemma E Collins, Ian D Hogg, Peter Convey, Leopoldo G. Sancho, Don A Cowan, W Berry Lyons, Byron J Adams, Diana H Wall, TG Allan Green

Diana H Wall  
Email: [Diana.Wall@colostate.edu](mailto:Diana.Wall@colostate.edu)

**This PDF file includes:**

Supplementary text  
Tables S1 to S4  
SI References

## Supplementary Information Text

### Extended methodology

DNA sequencing was undertaken either at the University of Waikato (UoW), New Zealand or the Canadian Centre for DNA barcoding (CCDB), Canada. For total DNA extraction, a REDEExtract-N-Amp kit (Sigma-Aldrich) was used at the UoW while a glass fibre plate method (AcroPrep) was used at the CCDB [1]. The DNA barcoding region (658 bp) of the mitochondrial cytochrome c oxidase subunit I (COI) gene was amplified using the universal primers HCO2198 (5'-TAAACTTCAGGGTGACCAAAAAATCA-3') and LCO1490 (5'-GGTCAACAAATCATAAAGATATTGG-3') [2] at the UoW, and the primers LepF1 (5'-ATTCAACCAATCATAAAGATATTGG-3') and LepR1 (5'-TAAACTTCTGGATGTCCAAAAATCA-3') [3] at CCDB. At the UoW, PCR amplifications for each specimen were carried out in 15 µL volumes containing 7.5 µL PCR master mix solution (i-Taq) (Intron Biotechnology), 0.2 µM (0.3 µL) of each primer and 1 µL of DNA extract (unquantified). Thermal cycling conditions were: 94 °C for 5 min followed by 5 cycles (94 °C for 1 min, 48 °C for 1.5 min and 72 °C for 1 min) then 35 cycles (94 °C for 1 min, 52 °C for 1.5 min and 72 °C for 1 min) of denaturation and polymerase amplification, with a final elongation at 72 °C for 5 min. At CCDB, thermal cycling conditions were: 94 °C for 1 min followed by 5 cycles (94 °C for 1 min, 45 °C for 1.5 min and 72 °C for 1.5 min) then 35 cycles (94 °C for 1 min, 50 °C for 1.5 min and 72 °C for 1 min) of denaturation and polymerase amplification, with a final elongation at 72 °C for 5 min. Successful amplification products were cleaned with 0.1 µL Exonuclease I (EXO) (10 U/µL) and 0.2 µL Shrimp Alkaline Phosphate (SAP) (1 U/µL) (Illustra from GE Healthcare) at 37°C for 30 min then 80°C for 15 min at the UoW, or Sephadex at CCDB. Sequencing was carried out in forward and reverse directions using an ABI 3130 at the UoW, or an ABI 3730x1 sequencer at CCDB. Sequences uploaded to the Barcode of Life Datasystems (BOLD) database and GenBank remain untrimmed, and for 126 of the 132 specimens generated in this study the full 658 bp COI gene region is covered.

All existing sequences have been labelled here according to previous haplotype assignment [4]. One individual from haplotype GHOD-076 (KX232741) had an additional substitution at site 82 which had been trimmed in the shorter (422 bp) alignment that was presented in [4], and we have accordingly renamed this individual as belonging to a new haplotype; GHOD-089.

**Table S1.** Collection locations for the four endemic species of Collembola now known from the Queen Alexandra Range (QAR) and the Queen Maud Mountains (QMM). The number of COI sequences (560 bp) for each of the four Collembola species (*Antarctophorus subpolaris*, ASUB; *Biscoia sudpolaris*, BSUD; *Gomphiocephalus hodgsoni*, GHOD; *Tullbergia mediantarctica*, TMED) are provided, of which those previously available in GenBank are shown in parentheses.

| Locality Site                    | Latitude | Longitude | Elevation (m a.s.l.) | ASUB  | BSUD  | GHOD | TMED |
|----------------------------------|----------|-----------|----------------------|-------|-------|------|------|
| <i>North Beardmore Gl. (QAR)</i> |          |           |                      |       |       |      |      |
| Gateway Ridge                    | -83.491  | 170.778   | 201                  |       | 10    | 12   |      |
| <i>South Beardmore Gl. (QMM)</i> |          |           |                      |       |       |      |      |
| Ebony Ridge                      | -83.761  | 172.745   | 775                  | 8(6)  | 11    |      |      |
| Mount Kyffin                     | -83.774  | 171.835   | 735                  |       | 1     |      |      |
| Harcourt Spur                    | -83.806  | 172.268   | 762                  |       | 13(1) |      |      |
| <i>West Shackleton Gl. (QMM)</i> |          |           |                      |       |       |      |      |
| Mount Franke                     | -84.617  | -176.700  | 500                  | 3     |       |      | 9    |
| Mount Wasko                      | -84.560  | -176.820  | 387                  | 1     |       |      | 8    |
| Mount Speed                      | -84.467  | -176.467  | 300                  |       |       |      | 15   |
| Mount Speed Spur                 | -84.450  | -177.150  | 410                  |       |       |      | 9    |
| <i>East Shackleton Gl. (QMM)</i> |          |           |                      |       |       |      |      |
| Massam Glacier                   | -84.559  | -175.009  | 368                  | 5     |       |      |      |
| Garden Spur                      | -84.536  | -174.944  | 387                  | 25    |       |      |      |
| Nielsen Peak                     | -84.533  | -175.500  | 471                  |       |       |      | 9    |
| <i>Negative Sites</i>            |          |           |                      |       |       |      |      |
| Darwin Glacier                   | -79.870  | 159.360   | 475                  |       |       |      |      |
| Cloudmaker                       | -84.264  | 169.313   | 1842                 |       |       |      |      |
| Meyer Desert                     | -85.254  | 167.275   | 2290                 |       |       |      |      |
| Waldron Spur                     | -84.542  | -174.780  | 607                  |       |       |      |      |
| Thanksgiving Valley              | -84.919  | -177.060  | 1298                 |       |       |      |      |
| Taylor Nunatak                   | -84.900  | -176.000  | 1517                 |       |       |      |      |
| Kitching Ridge                   | -85.198  | -177.102  | 1808                 |       |       |      |      |
| Bennett Platform                 | -85.207  | -177.389  | 1646                 |       |       |      |      |
| Mount Augusta                    | -85.227  | -174.353  | 2939                 |       |       |      |      |
| Schroeder Hill                   | -85.383  | -175.200  | 2699                 |       |       |      |      |
| Roberts Massif                   | -85.533  | -177.083  | 2200                 |       |       |      |      |
| Durham Point                     | -85.539  | -151.150  | 406                  |       |       |      |      |
| Mount Howe                       | -87.345  | -149.252  | 2602                 |       |       |      |      |
| TOTAL                            |          |           |                      | 42(6) | 35(1) | 12   | 50   |

**Table S2.** Tests of nucleotide substitution saturation performed separately for each of the four divergent species of Collembola (*Antarctophorus subpolaris*, ASUB; *Gomphiocephalus hodgsoni*, GHOD; *Antarctocinella monoculata*, AMON; *Cryptopygus nivicolus*, CNIV). The numbers of sequences ( $n$ ) included are only those longer than 560 bp. Unique haplotypes ( $h$ ) are also shown, along with the best-fit model of sequence evolution according to ModelFinder Plus [5] as implemented in IQ-Tree [6]. Sequence alignments for the four species were each 560 bp in length, utilized for the test by [7] as implemented in DAMBE 7.0.48 [8], showing substitution saturation is unlikely for all codon positions tested ( $P < 0.01$ ).

| Species | $n$ | $h$ | best-fit model (IQ-tree) | Codon position 1 and 2, combined |        |        |       | Codon position 3 |        |       |
|---------|-----|-----|--------------------------|----------------------------------|--------|--------|-------|------------------|--------|-------|
|         |     |     |                          | P(inv)                           | lss    | lss.C  | $P$   | lss              | lss.C  | $P$   |
| ASUB    | 42  | 9   | HKY+F+G4                 | 0.1441                           | 0.1301 | 0.7428 | <0.01 | 0.3281           | 0.7174 | <0.01 |
| GHOD    | 674 | 75  | HKY+F+I                  | 0.5779                           | 0.1553 | 0.7577 | <0.01 | 0.2177           | 0.7409 | <0.01 |
| AMON    | 27  | 4   | HKY+F                    | 0.8660                           | 0.6630 | 0.8059 | <0.01 | 0.2387           | 0.7761 | <0.01 |
| CNIV    | 37  | 13  | HKY+F                    | 0.6358                           | 0.0728 | 0.7270 | <0.01 | 0.0706           | 0.6662 | <0.01 |

**Table S3.** All sequences included in analyses for the four species of Collembola now known from the Queen Alexandra Range and the Queen Maud Mountains.

| Species                          | Haplotype code | BOLD sequence ID | Sample | Site name      | Source |
|----------------------------------|----------------|------------------|--------|----------------|--------|
| <i>Antarctophorus subpolaris</i> |                |                  |        |                |        |
|                                  | ASUB-001       | GBCO390-09       |        | Ebony Ridge    | [9]    |
|                                  | ASUB-002       | GBCO389-09       |        | Ebony Ridge    | [9]    |
|                                  | ASUB-003       | GBCO0098-06      |        | Ebony Ridge    | [10]   |
|                                  | ASUB-002       | ANTSP1362-18*    | KYBJA6 | Ebony Ridge    |        |
|                                  | ASUB-002       | ANTSP106-11      | KYUN5  | Ebony Ridge    |        |
|                                  | ASUB-005       | ANTSP001-11*     | GS5    | Garden Spur    |        |
|                                  | ASUB-006       | ANTSP002-11      | GS5    | Garden Spur    |        |
|                                  | ASUB-005       | ANTSP003-11      | GS5    | Garden Spur    |        |
|                                  | ASUB-007       | ANTSP004-11      | GS13   | Garden Spur    |        |
|                                  | ASUB-007       | ANTSP005-11      | GS13   | Garden Spur    |        |
|                                  | ASUB-007       | ANTSP006-11      | GS13   | Garden Spur    |        |
|                                  | ASUB-007       | ANTSP007-11      | GS13   | Garden Spur    |        |
|                                  | ASUB-007       | ANTSP011-11      | MG2    | Massam Glacier |        |
|                                  | ASUB-005       | ANTSP012-11      | MG2    | Massam Glacier |        |
|                                  | ASUB-004       | ANTSP013-11      | MG3    | Massam Glacier |        |
|                                  | ASUB-005       | ANTSP022-11      | GS5    | Garden Spur    |        |
|                                  | ASUB-005       | ANTSP023-11      | GS5    | Garden Spur    |        |
|                                  | ASUB-005       | ANTSP024-11      | GS5    | Garden Spur    |        |
|                                  | ASUB-007       | ANTSP025-11      | GS6    | Garden Spur    |        |
|                                  | ASUB-007       | ANTSP026-11      | GS6    | Garden Spur    |        |
|                                  | ASUB-007       | ANTSP027-11      | GS6    | Garden Spur    |        |
|                                  | ASUB-007       | ANTSP028-11      | GS6    | Garden Spur    |        |
|                                  | ASUB-007       | ANTSP029-11      | GS6    | Garden Spur    |        |
|                                  | ASUB-005       | ANTSP032-11      | MG1    | Massam Glacier |        |
|                                  | ASUB-007       | ANTSP033-11      | MG1    | Massam Glacier |        |
|                                  | ASUB-005       | ANTSP077-11      | GS16   | Garden Spur    |        |
|                                  | ASUB-005       | ANTSP078-11      | GS16   | Garden Spur    |        |
|                                  | ASUB-007       | ANTSP079-11      | GS16   | Garden Spur    |        |
|                                  | ASUB-005       | ANTSP082-11      | GS14   | Garden Spur    |        |
|                                  | ASUB-005       | ANTSP084-11      | GS14   | Garden Spur    |        |
|                                  | ASUB-005       | ANTSP085-11      | GS13   | Garden Spur    |        |
|                                  | ASUB-005       | ANTSP086-11      | GS13   | Garden Spur    |        |
|                                  | ASUB-007       | ANTSP087-11      | GS13   | Garden Spur    |        |
|                                  | ASUB-007       | ANTSP088-11      | GS13   | Garden Spur    |        |
|                                  | ASUB-007       | ANTSP089-11      | GS13   | Garden Spur    |        |
|                                  | ASUB-008       | ANTSP1101-18     | MW4-3  | Mount Wasiko   |        |
|                                  | ASUB-009       | ANTSP1127-18*    | MFX1   | Mount Franke   |        |
|                                  | ASUB-008       | ANTSP1128-18     | MFX1   | Mount Franke   |        |
|                                  | ASUB-008       | ANTSP1129-18     | MFX1   | Mount Franke   |        |
| <i>Biscoia sudpolaris</i>        |                |                  |        |                |        |
|                                  | BSUD-001       | GBCO0083-06      |        | Harcourt Spur  | [11]   |
|                                  | BSUD-002       | ANTSP051-11      | HS8    | Harcourt Spur  |        |
|                                  | BSUD-003       | ANTSP052-11      | GR1    | Gateway Ridge  |        |
|                                  | BSUD-003       | ANTSP053-11      | GR1    | Gateway Ridge  |        |
|                                  | BSUD-003       | ANTSP055-11      | GR1    | Gateway Ridge  |        |
|                                  | BSUD-003       | ANTSP056-11      | GR9    | Gateway Ridge  |        |
|                                  | BSUD-003       | ANTSP057-11      | GR9    | Gateway Ridge  |        |
|                                  | BSUD-003       | ANTSP058-11      | GR9    | Gateway Ridge  |        |
|                                  | BSUD-003       | ANTSP059-11      | GR9    | Gateway Ridge  |        |

---

|          |               |        |               |
|----------|---------------|--------|---------------|
| BSUD-003 | ANTSP060-11   | GR9    | Gateway Ridge |
| BSUD-003 | ANTSP061-11   | GR9    | Gateway Ridge |
| BSUD-003 | ANTSP109-11   | KYDW1  | Ebony Ridge   |
| BSUD-003 | ANTSP110-11   | KYDW1  | Ebony Ridge   |
| BSUD-003 | ANTSP111-11   | KYDW2  | Ebony Ridge   |
| BSUD-003 | ANTSP724-15   | KYUN12 | Ebony Ridge   |
| BSUD-003 | ANTSP099-11   | KYUN4  | Ebony Ridge   |
| BSUD-003 | ANTSP101-11   | KYUN4  | Ebony Ridge   |
| BSUD-003 | ANTSP102-11   | KYUN4  | Ebony Ridge   |
| BSUD-003 | ANTSP1354-18  | KYUN4  | Ebony Ridge   |
| BSUD-003 | ANTSP105-11   | KYUN5  | Ebony Ridge   |
| BSUD-003 | ANTSP107-11   | KYUN5  | Ebony Ridge   |
| BSUD-003 | ANTSP1360-18* | KYUN8  | Ebony Ridge   |
| BSUD-003 | ANTSP066-11   | HS6    | Harcourt Spur |
| BSUD-003 | ANTSP049-11   | HS8    | Harcourt Spur |
| BSUD-003 | ANTSP050-11   | HS8    | Harcourt Spur |
| BSUD-003 | ANTSP072-11   | HS8    | Harcourt Spur |
| BSUD-003 | ANTSP074-11   | HS8    | Harcourt Spur |
| BSUD-003 | ANTSP094-11   | HS8    | Harcourt Spur |
| BSUD-003 | ANTSP095-11   | HS8    | Harcourt Spur |
| BSUD-003 | ANTSP097-11   | HS8    | Harcourt Spur |
| BSUD-003 | ANTSP073-11   | HS8    | Harcourt Spur |
| BSUD-003 | ANTSP093-11   | HS8    | Harcourt Spur |
| BSUD-004 | ANTSP096-11   | HS8    | Harcourt Spur |
| BSUD-005 | ANTSP041-11   | GR4    | Gateway Ridge |
| BSUD-005 | ANTSP076-11   | MK5    | Mt Kyffin     |

*Tullbergia mediantarctica*

|          |               |        |              |
|----------|---------------|--------|--------------|
| TMED-002 | ANTSP1071-18* | MFX3   | Mount Franke |
| TMED-002 | ANTSP1072-18  | MFX3   | Mount Franke |
| TMED-002 | ANTSP1073-18  | MFX3   | Mount Franke |
| TMED-002 | ANTSP1074-18  | MFX3   | Mount Franke |
| TMED-002 | ANTSP1075-18  | MFX3   | Mount Franke |
| TMED-002 | ANTSP1076-18  | MFX3   | Mount Franke |
| TMED-002 | ANTSP1077-18  | MFX3   | Mount Franke |
| TMED-002 | ANTSP1078-18  | MFX3   | Mount Franke |
| TMED-002 | ANTSP1079-18  | MFX3   | Mount Franke |
| TMED-002 | ANTSP1082-18  | MSP4-4 | Mount Speed  |
| TMED-002 | ANTSP1083-18  | MSP4-4 | Mount Speed  |
| TMED-002 | ANTSP1084-18  | MSP4-4 | Mount Speed  |
| TMED-002 | ANTSP1085-18  | MSP4-4 | Mount Speed  |
| TMED-002 | ANTSP1086-18  | MSP4-4 | Mount Speed  |
| TMED-002 | ANTSP1087-18  | MSP4-4 | Mount Speed  |
| TMED-002 | ANTSP1089-18  | MSP4-4 | Mount Speed  |
| TMED-002 | ANTSP1090-18  | MSP4-4 | Mount Speed  |
| TMED-002 | ANTSP1091-18  | MW4-3  | Mount Wasko  |
| TMED-002 | ANTSP1093-18  | MW4-3  | Mount Wasko  |
| TMED-002 | ANTSP1095-18  | MW4-3  | Mount Wasko  |
| TMED-002 | ANTSP1096-18  | MW4-3  | Mount Wasko  |
| TMED-002 | ANTSP1097-18  | MW4-3  | Mount Wasko  |
| TMED-002 | ANTSP1098-18  | MW4-3  | Mount Wasko  |
| TMED-003 | ANTSP1099-18  | MW4-3  | Mount Wasko  |
| TMED-002 | ANTSP1100-18  | MW4-3  | Mount Wasko  |
| TMED-002 | ANTSP1103-18  | MSSpur | Mount Speed  |
| TMED-002 | ANTSP1104-18  | MSSpur | Mount Speed  |
| TMED-002 | ANTSP1105-18  | MSSpur | Mount Speed  |

---

---

|                                 |              |        |               |
|---------------------------------|--------------|--------|---------------|
| TMED-001                        | ANTSP1106-18 | MSSpur | Mount Speed   |
| TMED-002                        | ANTSP1107-18 | MSSpur | Mount Speed   |
| TMED-002                        | ANTSP1108-18 | MSSpur | Mount Speed   |
| TMED-002                        | ANTSP1109-18 | MSSpur | Mount Speed   |
| TMED-002                        | ANTSP1110-18 | MSSpur | Mount Speed   |
| TMED-002                        | ANTSP1111-18 | MSSpur | Mount Speed   |
| TMED-002                        | ANTSP1112-18 | NP3-4  | Nielsen Peak  |
| TMED-002                        | ANTSP1113-18 | NP3-4  | Nielsen Peak  |
| TMED-002                        | ANTSP1114-18 | NP3-4  | Nielsen Peak  |
| TMED-002                        | ANTSP1115-18 | NP3-4  | Nielsen Peak  |
| TMED-002                        | ANTSP1116-18 | NP3-4  | Nielsen Peak  |
| TMED-002                        | ANTSP1117-18 | NP3-4  | Nielsen Peak  |
| TMED-002                        | ANTSP1118-18 | NP3-4  | Nielsen Peak  |
| TMED-002                        | ANTSP1120-18 | NP3-4  | Nielsen Peak  |
| TMED-002                        | ANTSP1121-18 | NP3-4  | Nielsen Peak  |
| TMED-002                        | ANTSP1281-18 | MSPX5  | Mount Speed   |
| TMED-002                        | ANTSP1283-18 | MSPX5  | Mount Speed   |
| TMED-002                        | ANTSP1284-18 | MSPX5  | Mount Speed   |
| TMED-002                        | NZGDW092-18  | MSP4-4 | Mount Speed   |
| TMED-002                        | NZGDW093-18  | MSP4-4 | Mount Speed   |
| TMED-002                        | NZGDW094-18  | MSP4-4 | Mount Speed   |
| TMED-002                        | NZGDW095-18  | MSP4-4 | Mount Speed   |
| <i>Gomphiocephalus hodgsoni</i> |              |        |               |
| GHOD-090                        | ANTSP039-11* | GR3    | Gateway Ridge |
| GHOD-090                        | ANTSP040-11  | GR3    | Gateway Ridge |
| GHOD-090                        | ANTSP042-11  | GR8    | Gateway Ridge |
| GHOD-090                        | ANTSP043-11  | GR8    | Gateway Ridge |
| GHOD-090                        | ANTSP046-11  | GR3    | Gateway Ridge |
| GHOD-090                        | ANTSP047-11  | GR3    | Gateway Ridge |
| GHOD-090                        | ANTSP054-11  | GR1    | Gateway Ridge |
| GHOD-090                        | ANTSP062-11  | GR9    | Gateway Ridge |
| GHOD-090                        | ANTSP063-11  | GR9    | Gateway Ridge |
| GHOD-090                        | ANTSP064-11  | GR9    | Gateway Ridge |
| GHOD-090                        | ANTSP065-11  | GR9    | Gateway Ridge |
| GHOD-090                        | ANTSP090-11  | GR11   | Gateway Ridge |

---

\* Sequences selected to represent phylogenetic clades

**Table S4.** Sequences included in analyses for the four species of Collembola from southern Victoria Land.

| SpeciesHaplotype code             | BOLD sequence ID | GenBank Accession | Site name        | Source |
|-----------------------------------|------------------|-------------------|------------------|--------|
| <i>Gomphiocephalus hodgsoni</i>   |                  |                   |                  |        |
| GHOD-001                          | ANTSP966-16*     | MK609301          | SVL widespread   | [12]   |
| GHOD-071                          | ANTSP223-13*     | KU876875          | Mt Gran          | [13]   |
| GHOD-071                          | ANTSP225-13      | KU876815          | Mt Gran          | [13]   |
| GHOD-075                          | ANTSP584-15      | KX232843          | Towle Glacier    | [4]    |
| GHOD-075                          | ANTSP585-15      | KX232842          | Towle Glacier    | [12]   |
| GHOD-076                          | ANTSP579-15*     | KX232814          | Towle Glacier    | [4]    |
| GHOD-076                          | ANTSP580-15      | KX232799          | Towle Glacier    | [4]    |
| GHOD-076                          | ANTSP582-15      | KX232729          | Towle Glacier    | [4]    |
| GHOD-089                          | ANTSP581-15      | KX232741          | Towle Glacier    | [4]    |
| <i>Antarcticinella monoculata</i> |                  |                   |                  |        |
| AMON-001                          | ANTSP258-13*     | KU876808          | Springtail Point | [13]   |
| AMON-003                          | ANTSP645-15      | KX232795          | Benson Glacier   | [4]    |
| AMON-004                          | ANTSP639-15      | KX232853          | Pegtop Mt        | [4]    |
| AMON-004                          | ANTSP641-15      | KX232698          | Pegtop Mt        | [4]    |
| AMON-005                          | ANTSP575-15*     | KX232851          | Cliff Nunatak    | [4]    |
| AMON-005                          | ANTSP576-15      | KX232789          | Cliff Nunatak    | [4]    |
| AMON-005                          | ANTSP577-15      | KX232834          | Cliff Nunatak    | [4]    |
| AMON-005                          | ANTSP589-15      | KX232700          | Cliff Nunatak    | [4]    |
| AMON-005                          | ANTSP590-15      | KX232782          | Cliff Nunatak    | [4]    |
| AMON-005                          | ANTSP591-15      | KX232736          | Cliff Nunatak    | [4]    |
| AMON-005                          | ANTSP592-15      | KX232702          | Cliff Nunatak    | [4]    |
| AMON-005                          | ANTSP593-15      | KX232705          | Cliff Nunatak    | [4]    |
| AMON-005                          | ANTSP602-15      | KX232716          | Cliff Nunatak    | [4]    |
| AMON-005                          | ANTSP603-15      | KX232778          | Cliff Nunatak    | [4]    |
| AMON-005                          | ANTSP604-15      | KX232722          | Cliff Nunatak    | [4]    |
| AMON-005                          | ANTSP605-15      | KX232821          | Cliff Nunatak    | [4]    |
| AMON-005                          | ANTSP578-15      | KX232816          | Mt Murray        | [4]    |
| AMON-005                          | ANTSP594-15      | KX232811          | Mt Murray        | [4]    |
| AMON-005                          | ANTSP595-15      | KX232753          | Mt Murray        | [4]    |
| AMON-005                          | ANTSP596-15      | KX232761          | Mt Murray        | [4]    |
| AMON-005                          | ANTSP597-15      | KX232727          | Mt Murray        | [4]    |
| AMON-005                          | ANTSP598-15      | KX232817          | Mt Murray        | [4]    |
| AMON-005                          | ANTSP599-15      | KX232845          | Mt Murray        | [4]    |
| AMON-005                          | ANTSP600-15      | KX232687          | Mt Murray        | [4]    |
| AMON-005                          | ANTSP601-15      | KX232852          | Mt Murray        | [4]    |
| AMON-005                          | ANTSP636-15      | KX232689          | Mt Murray        | [4]    |
| AMON-005                          | ANTSP638-15      | KX232806          | Mt Murray        | [4]    |
| <i>Cryptopygus nivicolus</i>      |                  |                   |                  |        |
| CNIV-003                          | ANTSP118-13      | KU876880          | Springtail Point | [13]   |
| CNIV-004                          | ANTSP119-13      | KU876872          | Springtail Point | [13]   |
| CNIV-004                          | ANTSP121-13      | KU876871          | Springtail Point | [13]   |
| CNIV-004                          | ANTSP211-13      | KU876823          | Springtail Point | [13]   |
| CNIV-004                          | ANTSP212-13      | KU876800          | Springtail Point | [13]   |
| CNIV-004                          | ANTSP253-13      | KU876859          | Springtail Point | [13]   |
| CNIV-005                          | ANTSP559-15      | KX232836          | Mt Seuss         | [4]    |
| CNIV-005                          | ANTSP566-15      | KX232686          | Mt Seuss         | [4]    |
| CNIV-005                          | ANTSP567-15      | KX232824          | Mt Seuss         | [4]    |
| CNIV-005                          | ANTSP571-15      | KX232745          | Mt Seuss         | [4]    |



|          |              |          |                  |      |
|----------|--------------|----------|------------------|------|
| CNIV-005 | ANTSP632-15  | KX232855 | Tiger Island     | [4]  |
| CNIV-005 | ANTSP633-15  | KX232822 | Tiger Island     | [4]  |
| CNIV-005 | ANTSP634-15  | KX232826 | Tiger Island     | [4]  |
| CNIV-005 | ANTSP642-15  | KX232772 | Mt Gran          | [4]  |
| CNIV-005 | ANTSP643-15  | KX232743 | Mt Gran          | [4]  |
| CNIV-005 | ANTSP644-15  | KX232839 | Mt Gran          | [4]  |
| CNIV-005 | ANTSP698-15  | KX232854 | Mount Seuss      | [4]  |
| CNIV-005 | ANTSP700-15  | KX232790 | Mount Seuss      | [4]  |
| CNIV-005 | ANTSP701-15  | KX232758 | Mount Seuss      | [4]  |
| CNIV-005 | ANTSP728-15  | KX232684 | Mount Seuss      | [4]  |
| CNIV-005 | ANTSP124-13  | KU876789 | Mt Gran          | [13] |
| CNIV-005 | ANTSP156-13  | KU876834 | Mt Seuss         | [13] |
| CNIV-006 | ANTSP155-13  | KU876857 | Mt Seuss         | [13] |
| CNIV-007 | ANTSP170-13  | KU876811 | Mt Seuss         | [13] |
| CNIV-008 | ANTSP220-13  | KU876836 | Mt Gran          | [13] |
| CNIV-008 | ANTSP222-13  | KU876860 | Mt Gran          | [13] |
| CNIV-009 | ANTSP249-13  | KU876842 | Springtail Point | [13] |
| CNIV-010 | ANTSP250-13  | KU876877 | Springtail Point | [13] |
| CNIV-011 | ANTSP251-13  | KU876869 | Springtail Point | [13] |
| CNIV-011 | ANTSP257-13  | KU876844 | Springtail Point | [13] |
| CNIV-012 | ANTSP254-13* | KU876862 | Springtail Point | [13] |
| CNIV-013 | ANTSP256-13  | KU876813 | Mt Gran          | [13] |
| CNIV-014 | ANTSP560-15  | KX232773 | Mt Seuss         | [4]  |
| CNIV-014 | ANTSP573-15  | KX232760 | Mt Seuss         | [4]  |
| CNIV-015 | ANTSP570-15* | KX232840 | Mt Seuss         | [4]  |
| CNIV-016 | ANTSP625-15* | KX232765 | Towle Glacier    | [4]  |
| CNIV-016 | ANTSP626-15  | KX232747 | Towle Glacier    | [4]  |

\* Sequences selected to represent phylogenetic clades

## SI References

1. N. V Ivanova, J. R. Dewaard, P. D. N. Hebert, An inexpensive, automation-friendly protocol for recovering high-quality DNA. *Mol. Ecol. Notes* **6**, 998–1002 (2006).
2. B. Folmer, W. Hoeh, R. Lutz, R. Vrijenhoek, DNA primers for amplification of mitochondrial cytochrome *c* oxidase subunit I from diverse metazoan invertebrates. *Mol. Mar. Biol. Biotechnol.* **3**, 294–299 (1994).
3. P. D. N. Hebert, E. H. Penton, J. M. Burns, D. H. Janzen, W. Hallwachs, Ten species in one: DNA barcoding reveals cryptic species in the neotropical skipper butterfly *Astraptes fulgerator*. *Proc. Natl. Acad. Sci. U. S. A.* **101**, 14812–14817 (2004).
4. G. E. Collins, I. D. Hogg, P. Convey, A. D. Barnes, I. R. McDonald, Spatial and temporal scales matter when assessing the species and genetic diversity of springtails (Collembola) in Antarctica. *Front. Ecol. Evol.* **7**, 76 (2019).
5. S. Kalyaanamoorthy, B. Q. Minh, T. K. F. Wong, A. von Haeseler, L. S. Jermiin, ModelFinder: fast model selection for accurate phylogenetic estimates. *Nat. Methods* **14**, 587–589 (2017).
6. L. T. Nguyen, H. A. Schmidt, A. Von Haeseler, B. Q. Minh, IQ-TREE: A fast and effective stochastic algorithm for estimating maximum-likelihood phylogenies. *Mol. Biol. Evol.* **32**, 268–274 (2015).
7. X. Xia, Z. Xie, M. Salemi, L. Chen, Y. Wang, An index of substitution saturation and its application. *Mol. Phylogenet. Evol.* **26**, 1–7 (2003).
8. X. Xia, DAMBE7: New and improved tools for data analysis in molecular biology and evolution. *Mol. Biol. Evol.* **35**, 1550–1552 (2018).
9. M. I. Stevens, P. Greenslade, I. D. Hogg, P. Sunnucks, Southern Hemisphere springtails: Could any have survived glaciation of Antarctica? *Mol. Biol. Evol.* **23**, 874–882 (2006).
10. M. I. Stevens, A. Fjellberg, P. Greenslade, I. D. Hogg, P. Sunnucks, Redescription of the Antarctic springtail *Desoria klovstadi* using morphological and molecular evidence. *Polar Biol.* **29**, 820–830 (2006).
11. M. I. Stevens, I. D. Hogg, Contrasting levels of mitochondrial DNA variability between mites (Penthalodidae) and springtails (Hypogastruridae) from the Trans-Antarctic Mountains suggest long-term effects of glaciation and life history on substitution rates, and speciation processes. *Soil Biol. Biochem.* **38**, 3171–3180 (2006).
12. K. R. Bennett, I. D. Hogg, B. J. Adams, P. D. N. Hebert, High levels of intraspecific genetic divergences revealed for Antarctic springtails: Evidence for small-scale isolation during Pleistocene glaciation. *Biol. J. Linn. Soc.* **119**, 166–178 (2016).
13. C. R. Beet, *et al.*, Genetic diversity among populations of Antarctic springtails (Collembola) within the Mackay Glacier ecotone. *Genome* **59**, 762–770 (2016).
